# Supplementary material
Source: HighWire-hosted journal article supplement (https://bmjopen.bmj.com/content/8/11/e020527)
Supplement: inline-supplementary-material-1 [file inline-supplementary-material-1.pdf]

**Table S1. Baseline characteristics of burn patients according to survive or not.**

| <b>Variables</b>                        | <b>Survivors<br/>(n=932)</b> | <b>Non-Survivors<br/>(n=54)</b> | <b>P value</b> |
|-----------------------------------------|------------------------------|---------------------------------|----------------|
| <b>Male, n(%)</b>                       | 604 (64.8%)                  | 38 (70.4%)                      | 0.405          |
| <b>Age (years), median (25th, 75th)</b> | 37 (18, 49)                  | 40 (24, 50)                     | 0.305          |
| <b>Diabetes, n (%)</b>                  | 36 (3.9%)                    | 2 (3.7%)                        | 0.953          |
| <b>TBSA, n (%)</b>                      |                              |                                 |                |
| <10%                                    | 464 (49.8%)                  | 5 (9.3%)                        | <b>0.000</b>   |
| 10-29%                                  | 287 (30.8%)                  | 17 (31.5%)                      | 0.915          |
| ≥30%                                    | 181 (19.4%)                  | 32 (59.3%)                      | <b>0.000</b>   |
| <b>Full thickness burn, n (%)</b>       | 208 (22.3%)                  | 13 (24.1%)                      | 0.763          |
| <b>Inhalation injury, n (%)</b>         | 24 (2.6%)                    | 22 (40.7%)                      | <b>0.000</b>   |
| <b>Burn types, n (%)</b>                |                              |                                 |                |
| Flame                                   | 727 (78.0%)                  | 44 (81.5%)                      | 0.547          |
| Scalding                                | 89 (9.5%)                    | 5 (9.3%)                        | 0.944          |
| Electric                                | 71 (7.6%)                    | 2 (2.7%)                        | 0.285          |
| Others                                  | 43 (4.6%)                    | 3 (5.6%)                        | 0.750          |
| <b>NI, n (%)</b>                        | 131 (14.1%)                  | 25 (46.3%)                      | <b>0.000</b>   |

NI: nosocomial infection; TBSA: total body surface area
